# Supplementary material
Source: publisher site journal article supplement (https://www.dovepress.com/article/252994)

Supplementary figure 1. Correlation between the serum HBV RNA level and serum HBV DNA level (A). Correlation between the serum HBV RNA level and alanine aminotransferase (ALT) level (B).


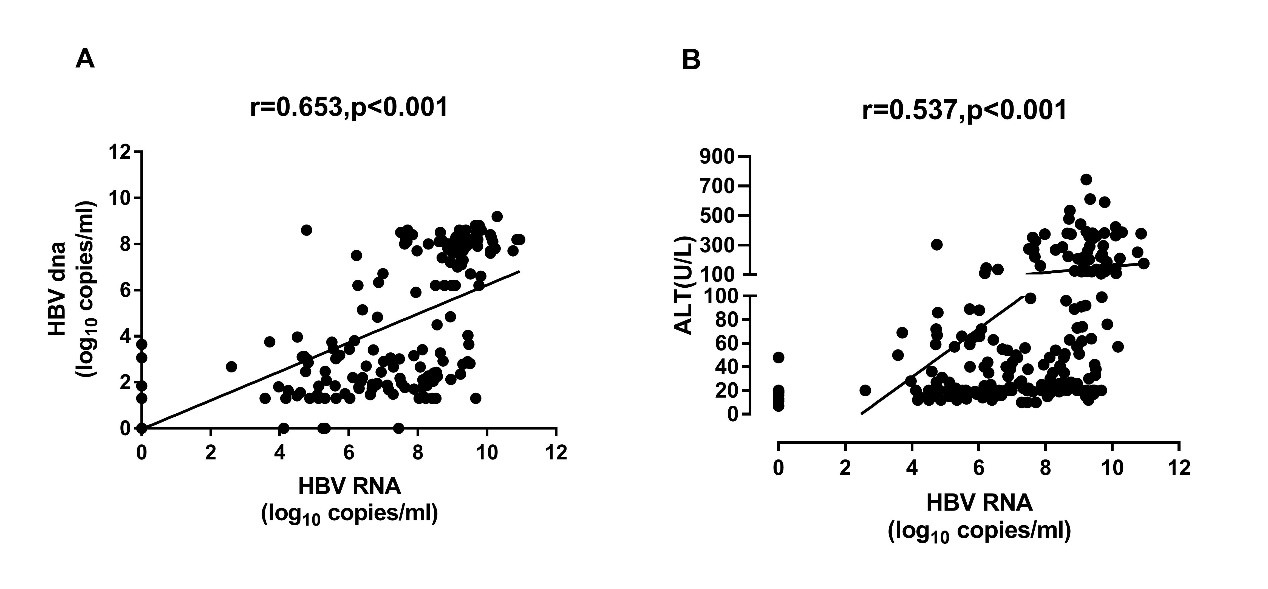

Supplement: Supplementary file 1 [file get_supplementary_file.php]
